# Supplementary material
Source: ML conference proceedings conference paper supplement (https://openreview.net/forum?id=Y1gX5XUUak)

$\mathcal{L}_{\text{global}}$

$$\Gamma_T(\lambda) < \Gamma_T(\lambda')$$

$\lambda'$

$\lambda$

$t$

$T$

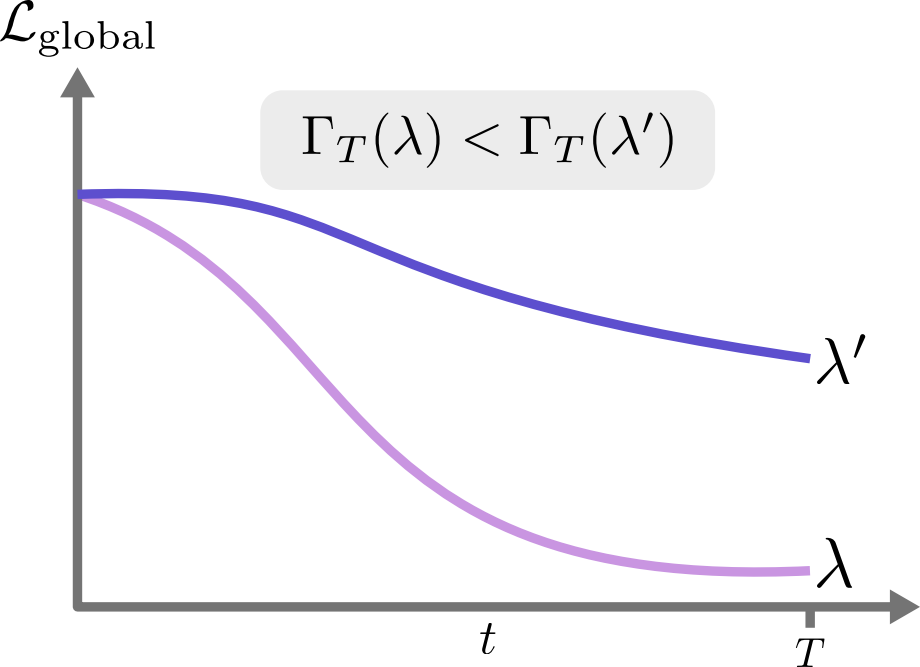

Supplement: supplementary_material [file attachment]
